# Supplementary material for: Ictal neural oscillatory alterations precede sudden unexpected death in epilepsy
Source: PubMed Central journal article supplement (PMC9035525; doi:10.1093/braincomms/fcac073), 2022-03-25
Supplement: fcac073_supplementary_data.pdf [file fcac073_supplementary_data.pdf]

Supplemental materials for

# **Ictal neural oscillatory alterations precede sudden unexpected death in epilepsy**

Bin Gu<sup>1,2,3</sup>, Noah G. Levine<sup>4</sup>, Wenjing Xu<sup>2,5</sup>, Rachel M. Lynch<sup>6</sup>,  
Fernando Pardo-Manuel de Villena<sup>6,7</sup>, and Benjamin D. Philpot<sup>2,3,8</sup>

<sup>1</sup>Department of Neuroscience, Ohio State University, Columbus, USA

<sup>2</sup>Department of Cell Biology and Physiology, University of North Carolina, Chapel Hill, USA

<sup>3</sup>Neuroscience Center, University of North Carolina, Chapel Hill, USA

<sup>4</sup>Electrical and Computer Engineering Program, Ohio State University, Columbus, USA

<sup>5</sup>Department of Physiology and Cell Biology, Ohio State University, Columbus, USA

<sup>6</sup>Department of Genetics, University of North Carolina, Chapel Hill, USA

<sup>7</sup>Lineberger Comprehensive Cancer Center, University of North Carolina, Chapel Hill, USA

<sup>8</sup>Carolina Institute for Developmental Disabilities, University of North Carolina, Chapel Hill, USA

Correspondence:

Bin Gu, Ph.D.

460 W 12th Avenue

612 Biomedical Research Tower

Columbus, OH 43210, USA

[bin.gu@osumc.edu](mailto:bin.gu@osumc.edu)

This PDF file includes Supplemental Figures 1 to 4

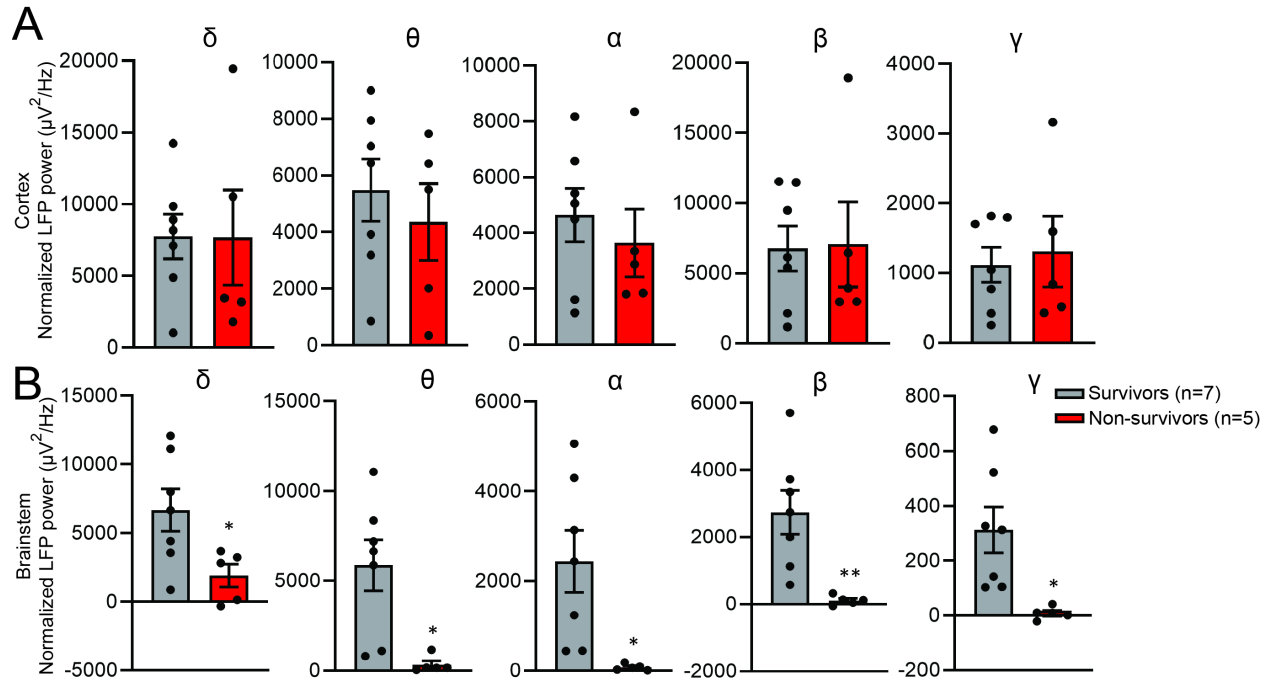

**Supplemental Figure 1.** (A) Normalized (subtracting baseline activities) ictal total LFP power in cortex of survivors ( $n = 7$ ) and non-survivors ( $n = 5$ ) in the delta ( $\delta$ , 1–4 Hz,  $P = 0.9840$ , Student’s t-test), theta ( $\theta$ , 5–8 Hz,  $P = 0.5290$ , Student’s t-test), alpha ( $\alpha$ , 9–12 Hz,  $P = 0.5298$ , Student’s t-test), beta ( $\beta$ , 13–29 Hz,  $P = 0.9293$ , Student’s t-test), and gamma ( $\gamma$ , 30–60 Hz,  $P = 0.7178$ , Student’s t-test) bands. (B) Normalized (subtracting baseline activities) ictal total LFP power in brainstem of survivors ( $n = 7$ ) and non-survivors ( $n = 5$ ) in the delta ( $\delta$ , 1–4 Hz,  $P = 0.0359$ , Student’s t-test), theta ( $\theta$ , 5–8 Hz,  $P = 0.0101$ , Mann-Whitney test), alpha ( $\alpha$ , 9–12 Hz,  $P = 0.0178$ , Student’s t-test), beta ( $\beta$ , 13–29 Hz,  $P = 0.0074$ , Student’s t-test), and gamma ( $\gamma$ , 30–60 Hz,  $P = 0.0128$ , Student’s t-test) bands. Data are presented as individual animal data points plus mean  $\pm$  SEM. Data are analyzed using two-tailed unpaired Student’s t-test or Mann-Whitney test, \*  $P < 0.05$ , \*\*  $P < 0.01$ .

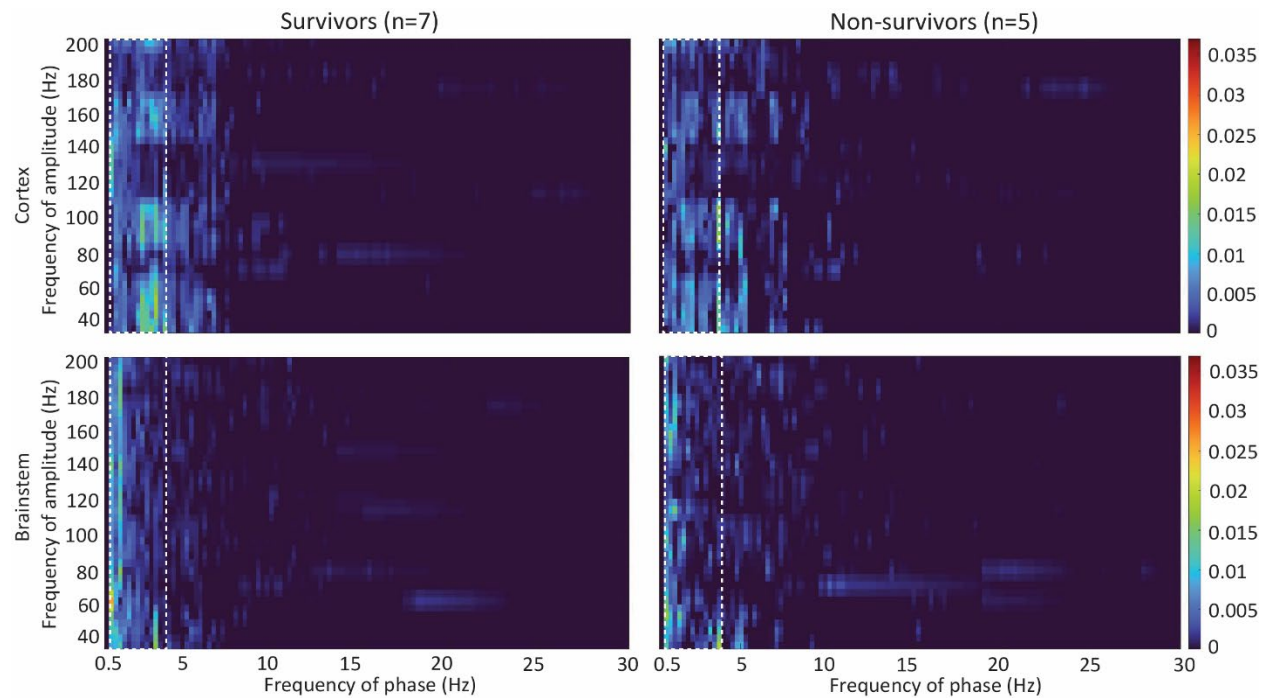

**Supplemental Figure 2.** Average comodulogram of ictal cortical (top row) and brainstem (bottom row) phase-amplitude coupling in the broader range (fP:0.5–30 Hz/fA:30–200 Hz) from survivors (n = 7, left column) and non-survivors (n = 5, right column). Dashed squares denote delta/gamma (fP:0.5–4 Hz/fA:30–200 Hz) coupling.

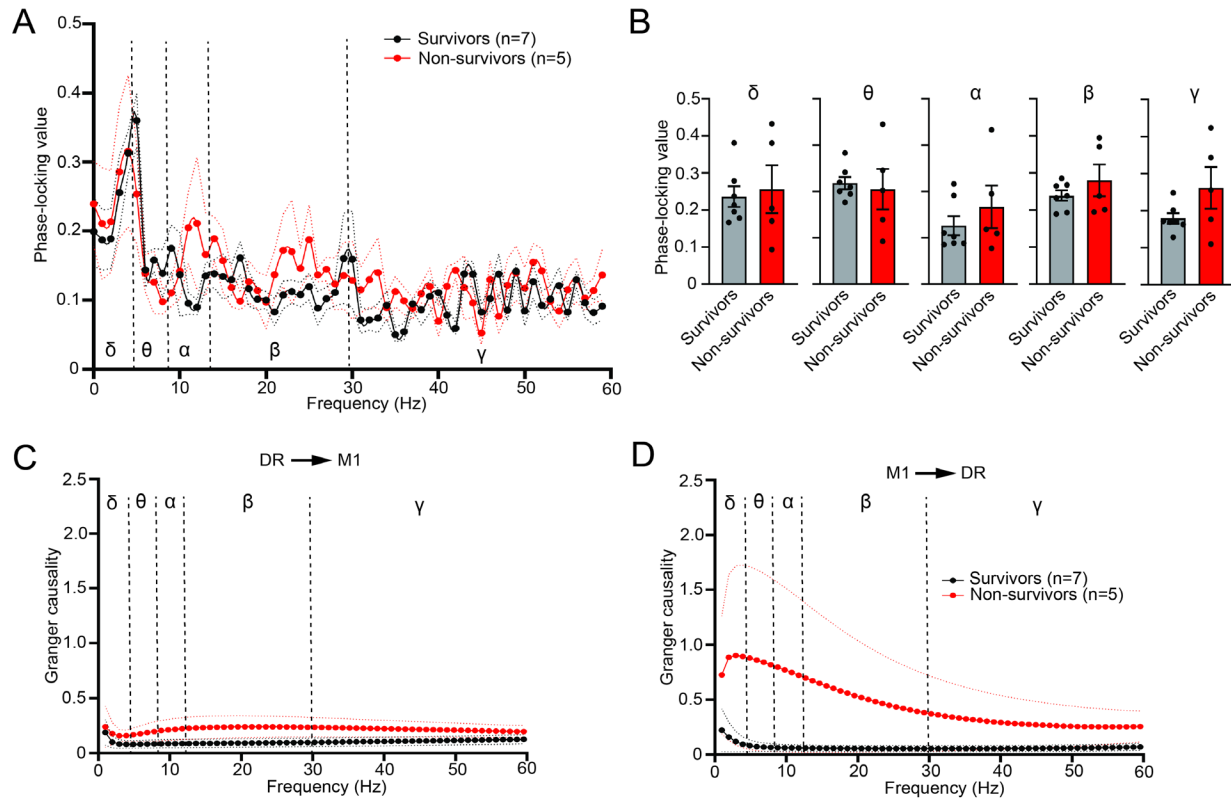

**Supplemental Figure 3.** (A) phase-locking value spectrum and (B) averaged phase-locking value between baseline LFP recorded from M1 and DR of survivors ( $n = 7$ ) and non-survivors ( $n = 5$ ) in the delta ( $\delta$ , 0.5–4 Hz,  $P = 0.7537$ , Student's t-test), theta ( $\theta$ , 5–8 Hz,  $P = 0.7508$ , Student's t-test), alpha ( $\alpha$ , 9–12 Hz,  $P = 0.5303$ , Mann-Whitney test), beta ( $\beta$ , 13–29 Hz,  $P = 0.3197$ , Student's t-test), and gamma ( $\gamma$ , 30–60 Hz,  $P = 0.1257$ , Student's t-test) bands. Granger causality of baseline LFP recorded from DR to M1 (C) and from M1 to DR (D), respectively, of survivors ( $n = 7$ ) and non-survivors ( $n = 5$ ). Data are presented as mean  $\pm$  SEM (A, C and D) or individual animal data points plus mean  $\pm$  SEM (B).

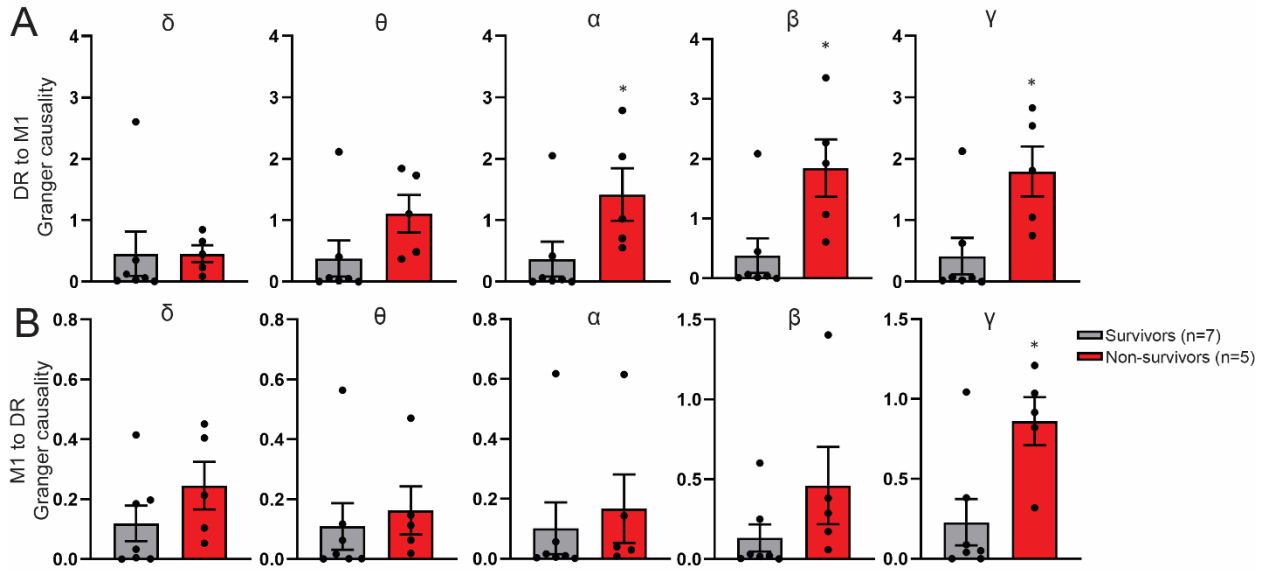

**Supplemental Figure 4.** (A) Granger causality of ictal LFP recorded from DR to M1 of survivors ( $n = 7$ ) and non-survivors ( $n = 5$ ) in the delta ( $\delta$ , 0.5–4 Hz,  $P = 0.1490$ , Mann-Whitney test), theta ( $\theta$ , 5–8 Hz,  $P = 0.0732$ , Mann-Whitney test), alpha ( $\alpha$ , 9–12 Hz,  $P = 0.0303$ , Mann-Whitney test), beta ( $\beta$ , 13–29 Hz,  $P = 0.0177$ , Mann-Whitney test), and gamma ( $\gamma$ , 30–60 Hz,  $P = 0.0177$ , Mann-Whitney test) bands. (B) Granger causality of ictal LFP recorded from M1 to DR of survivors ( $n = 7$ ) and non-survivors ( $n = 5$ ) in the delta ( $\delta$ , 0.5–4 Hz,  $P = 0.1490$ , Mann-Whitney test), theta ( $\theta$ , 5–8 Hz,  $P = 0.2020$ , Mann-Whitney test), alpha ( $\alpha$ , 9–12 Hz,  $P = 0.2677$ , Mann-Whitney test), beta ( $\beta$ , 13–29 Hz,  $P = 0.0732$ , Mann-Whitney test), and gamma ( $\gamma$ , 30–60 Hz,  $P = 0.0480$ , Mann-Whitney test) bands. Data are presented as individual animal data points plus mean  $\pm$  SEM. Data are analyzed using Mann-Whitney test, \*  $P < 0.05$ .
